# Supplementary material
Source: bioRxiv or medRxiv preprint supplement (https://www.biorxiv.org/highwire/filestream/2256/field_highwire_adjunct_files/4/008862-13.pdf)

DE genes, chimpanzee-human  
iPSCs, separate normalisation  
(testable n = 4,841)

DE genes, chimpanzee-human  
iPSCs, full model normalisation  
(testable n = 3,019)

1972

2869

150

7318 genes not DE in either

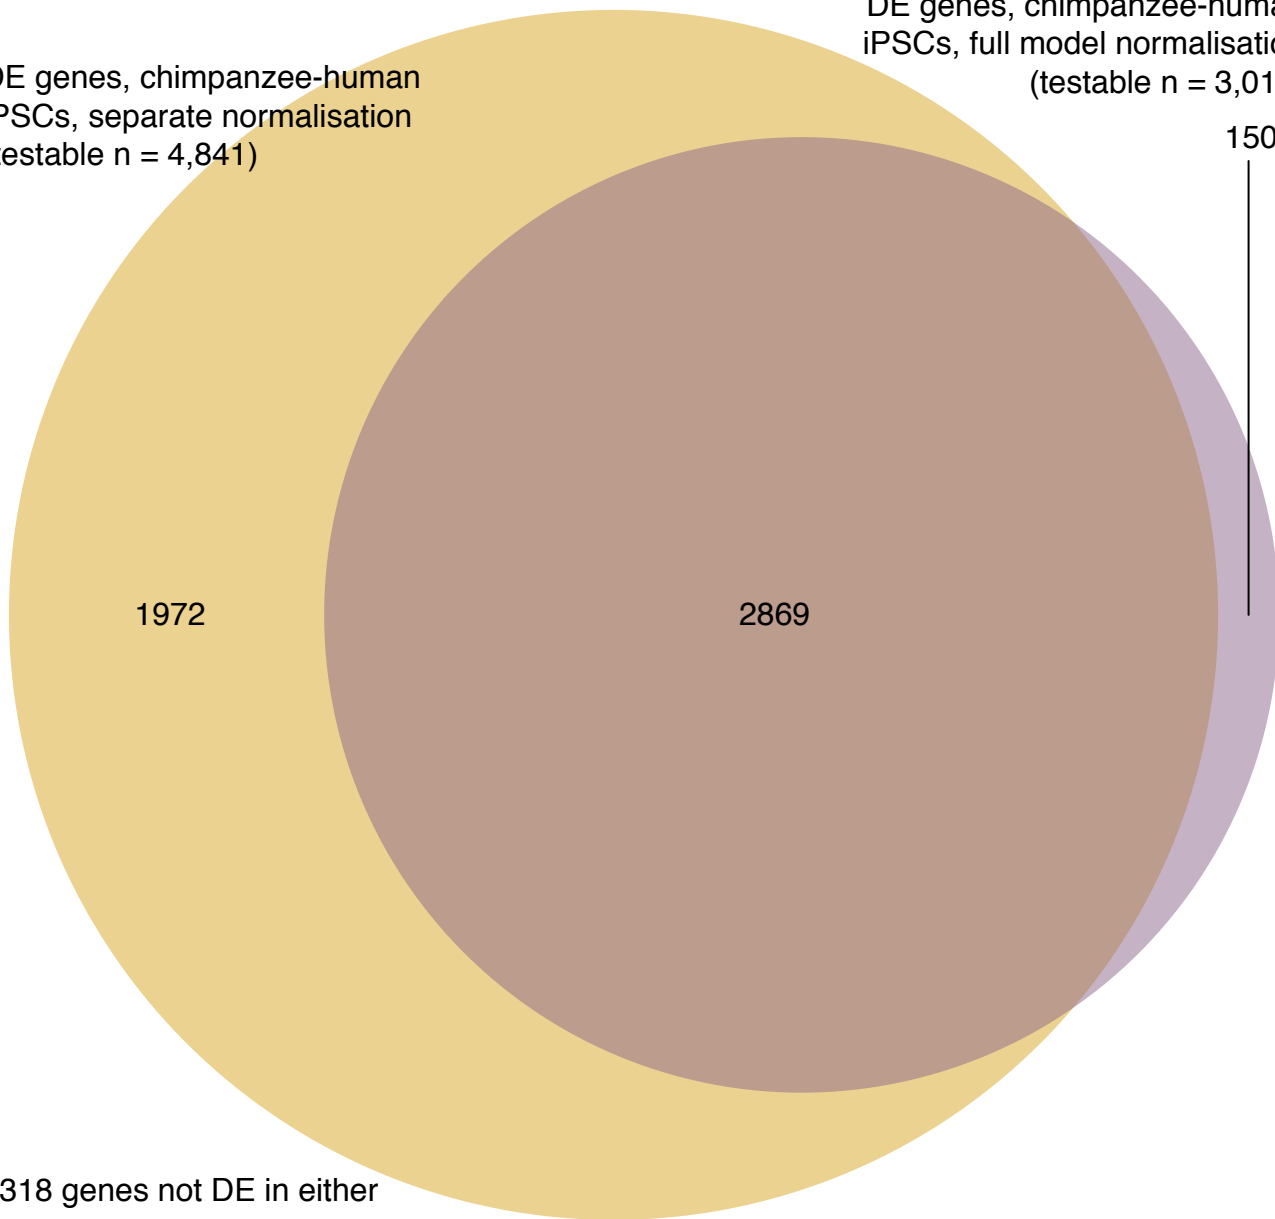

Supplement: Supplementary file [file 008862-13.pdf]
